# Supplementary material for: Upper critical solution temperature polymer-grafted hollow mesoporous silica nanoparticles for near-infrared-irradiated drug release
Source: Royal Society of Chemistry journal article supplement (doi:10.1039/c9tb01071h), 2019-01-01
Supplement: c9tb01071h1.pdf [file c9tb01071h1.pdf]

*Supporting Information*

**Upper Critical Solution Temperature Polymer Grafted Hollow Mesoporous Silica for Near-Infrared-Radiated Drug Release**

Wei Hu, <sup>a,b</sup> Xiaowen Bai, <sup>a</sup> Yaping Wang, <sup>a,b</sup> Zhentao Lei, <sup>a,b</sup> Haipeng Luo, <sup>a,b</sup> Zaizai Tong <sup>a,b</sup> \*

<sup>a</sup> *Key Laboratory of Advanced Textile Materials and Manufacturing Technology (ATMT), Ministry of Education, Department of Polymer Materials, Zhejiang Sci-Tech University, Hangzhou 310018, China*

<sup>b</sup> *Institute of Smart Fiber Materials, Zhejiang Sci-Tech University, Hangzhou 310018, China*

\*E-mail: tongzz@zstu.edu.cn

## 1. Synthesis of N-acryloyl glycinamide (NAGA).

Glycinamide hydrochloride (8.30 mg, 73.6 mmol), anhydrous potassium hydroxide (8.42 mg, 148.6 mmol), potassium carbonate (3.11 mg, 22.3 mmol) and magnesium sulfate (18.90 mg, 156.2 mmol) were dissolved in methanol (50 mL) at 0 °C. On the other hand, acryloyl chloride (6.08 mg, 65.2 mmol) was dissolved in diethyl ether (60 mL) at 0 °C. Then the acryloyl chloride solution was added dropwise to the above mixture while maintaining vigorous stirring at 0 °C for 2 h. The reaction was allowed to proceed at room temperature for another 6 h to ensure a complete reaction. The diethyl ether was then removed by rotary evaporation at 25 °C. The insoluble salts were filtered off and the methanol was removed by rotary evaporation at 40 °C. Finally, the product was further purified by recrystallization from a mixture of methanol (60 mL) and acetone (120 mL) at -25°C.

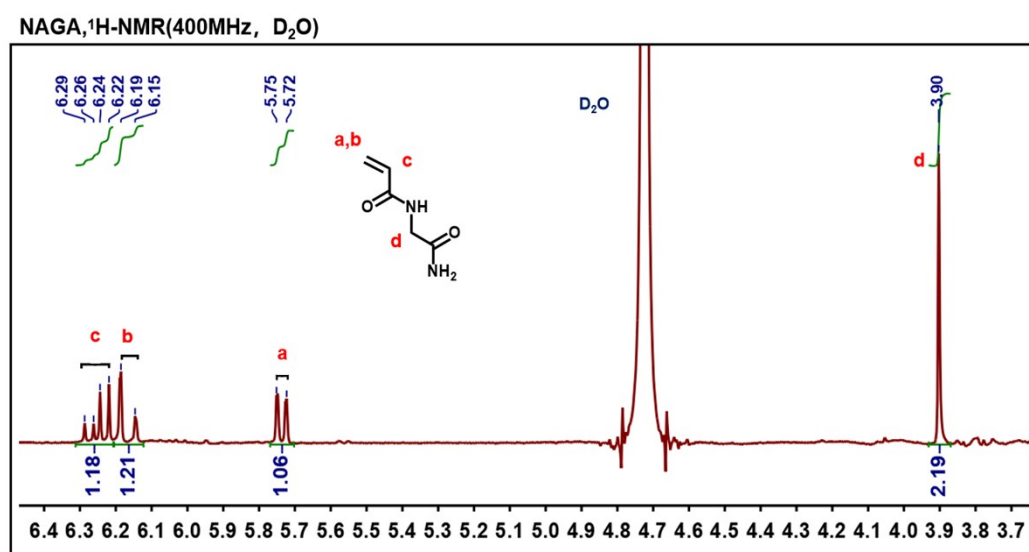

Figure S1. <sup>1</sup>H-NMR spectrum of the synthesized monomer NAGA with D<sub>2</sub>O solvent.

P(NAGAm-co-PNPhAm), <sup>1</sup>H-NMR (400MHz, DMSO-d<sub>6</sub>)

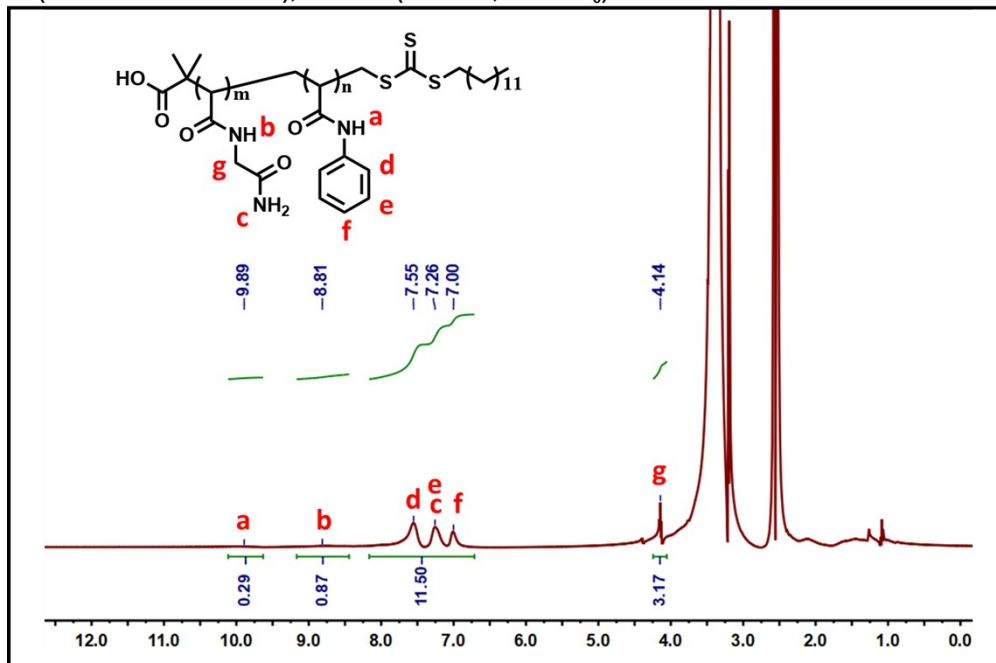

Figure S2. <sup>1</sup>H-NMR spectrum of polymer P(NAGAm-co-PNPhAm) with DMSO-*d*<sub>6</sub> solvent.

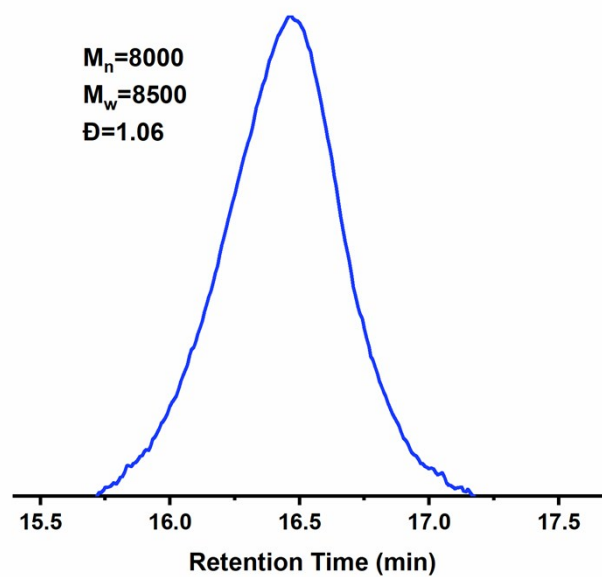

Figure S3. GPC curves of P(NAGAm-co-PNPhAm).

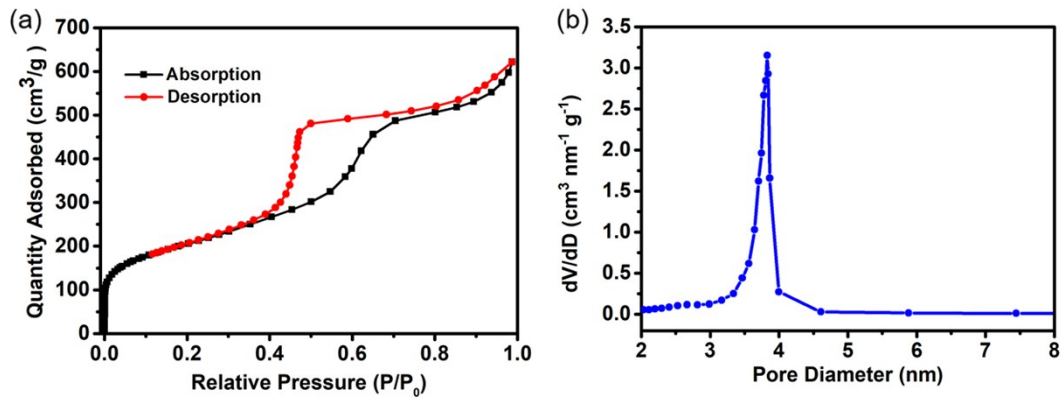

**Figure S4.** Specific surface area and aperture characterization of HMSNs and UCST@HMSNs. (a) Nitrogen adsorption isotherm of HMSNs. (b) Barrett-Joyner-Halenda (BJH) pore size distribution of HMSNs.

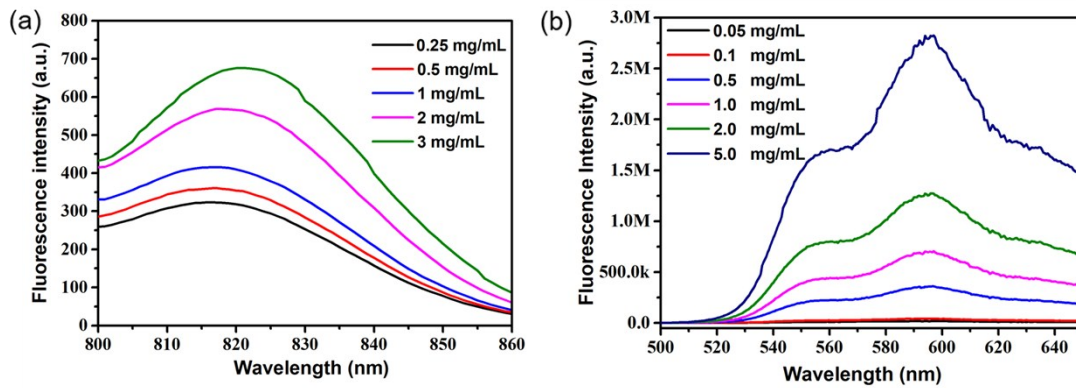

**Figure S5.** Fluorescence intensity curves of different concentrations of (a) ICG and (b) DOX.

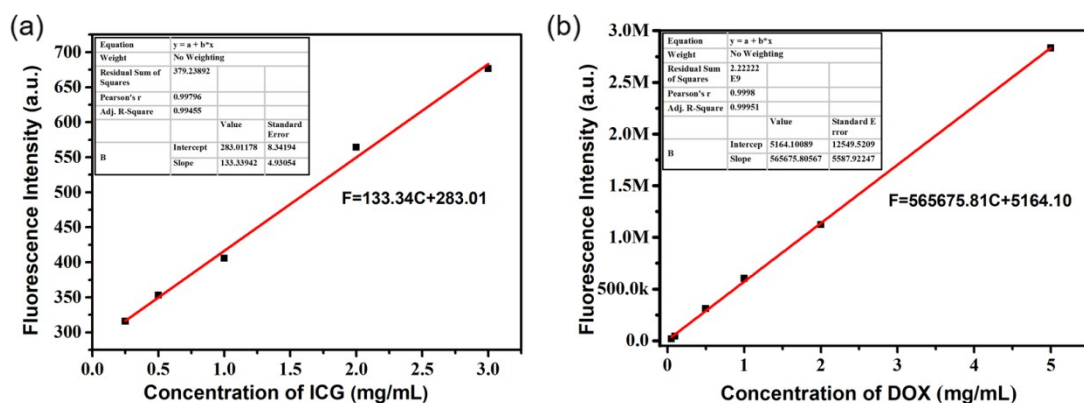

**Figure S6.** Standard curves of fluorescence intensity corresponding to concentration of (a) ICG and (b) DOX.
